# Supplementary material for: How can we assess the burden of muscle, bone and joint conditions in rural Botswana: context and methods for the MuBoJo focused ethnography
Source: Springer Nature journal article supplement (doi:10.1186/s12998-015-0056-9), 2015-02-10

Babatlisisi ba tla a buisanya le baagi ba motse ka tse ...

Matshwenyego a gago a letsatsi le letsatsi a mesifa, marapo le ditokololo (MuBoJo).

Ka fa matshwenyego a mesifa, marapo le ditokololo a amang botshelo jwa gago le tiro ka teng.

Ditsela tse di mosola go tlhokomela mathata a mesifa, marapo le ditokololo (MuBoJo).

Dithuso tse di tlhokafalang tsa mathata a mesifa, marapo le ditokololo (MuBoJo) mo Shoshong.

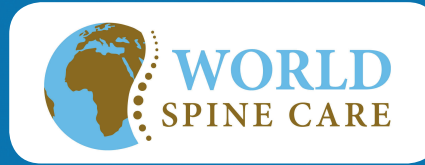

Dipotso ka dipatlisiso?  
Moeteledipele wa dipatlisiso  
Dr. Maria Hondras  
+267 7698 7262

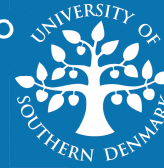

Dipotso ka kokelwana ya  
World Spine Care  
+267 476 9033  
(Ka fa marago ga kokelwana ya  
Shoshong)

Dipotso ka ditshwanelo tsa gago?  
Moemedi wa Lephata la Botsogo  
Mr. Pilate Khulumani  
+267 391 4467

Lephata la Botsogo mo Botswana le  
leteletse dipatlisiso ka letsatsi  
la 14 August 2013

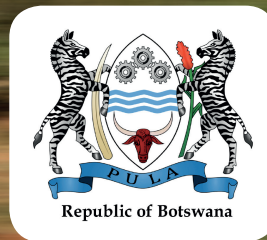

**Dipatlisiso  
Tsa  
MuBoJo**

Ke tsela efe e o ka tshelang  
le go tlhokomela **Mesifa,  
Marapo le Ditokololo**  
mo **Shoshong?**

Dipatlisiso tse, di tla re  
thusa go bona ditsela tse  
ka tsone re ka kgonang go  
tlhokomela tsa botsogo mo  
motseng

*Re batla go  
bua le wena!*

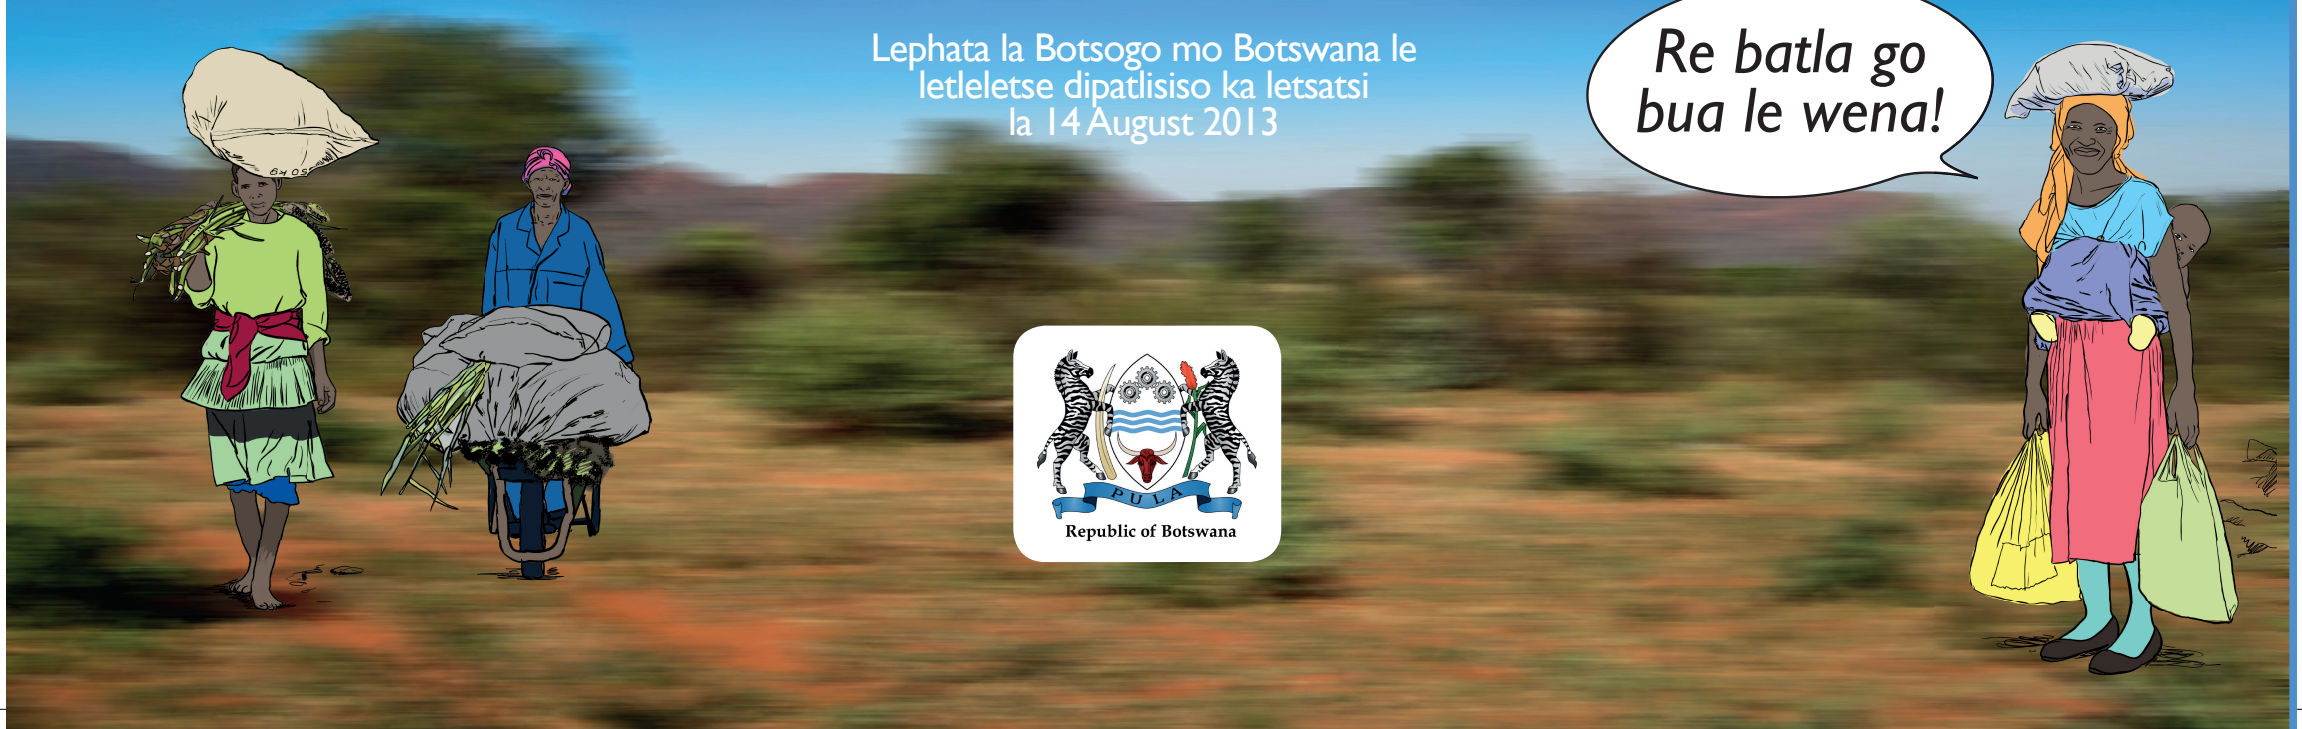

A o nale le ditlhabi, go opa, kgotsa matshwenyego mo mmeleng wa gago?

Kgotsa go botlhoko go se kae/go le gonnye.

Kgotsa o itse mongwe yo o nang le mathata a mesifa, marapo le ditokololo?

Ikopanye le rona! Re batla go buisanya le borre le bomme ba dingwaga tse di farologanyeng.

# Mu

## Muscles (Mesifa)

Mmele o na le mesifa e le makgolo a marataro le masome a matlhano (650).

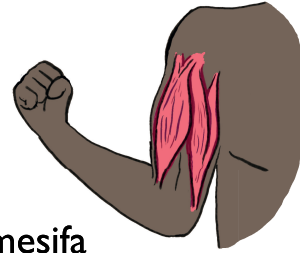

# Bo

## Bones (Marapo)

Mmele o na le marapo a le makgolo a mabedi le borataro (206).

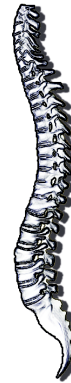

# Jo

## Joints (Ditokololo)

Mmele o na le ditokololo di le lekgolo, masome a roba bobedi le bosupa (187).

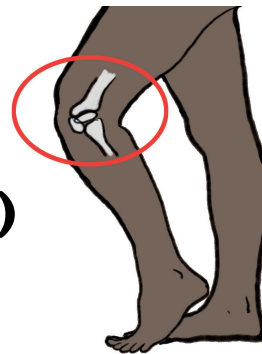

Re batla go ithuta mo go wena!

Dipuisanyo di ka nna tsa tsaya sebaka sa Oura.

Sengwe le sengwe se o se re bolelelang ke sephiri.

Ke tshwetso ya gago go tsenelela dipatlisiso tse.

O gololesegile go emisa dipuisanyo tsa dipatlisiso tse, nako e nngwe le e nngwe kwa ntle ga go fa lebaka.

Re thuse gore re kgone go thusa motse wa Shoshong!

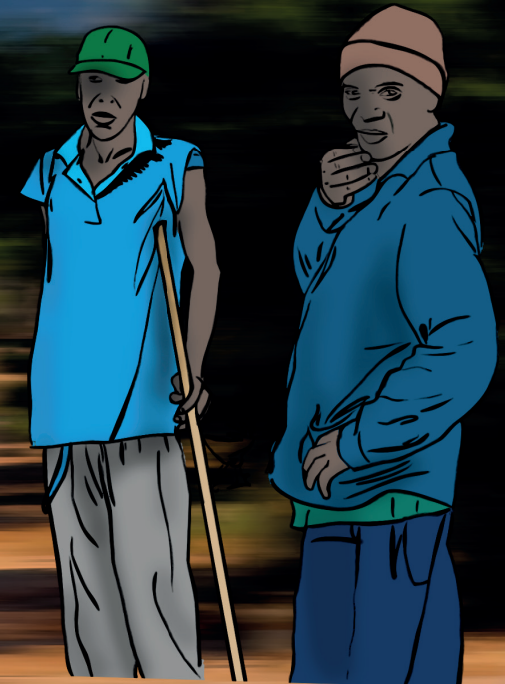

Supplement: MOESM2 [file 9771480]
