# Supplementary material for: How can we assess the burden of muscle, bone and joint conditions in rural Botswana: context and methods for the MuBoJo focused ethnography
Source: Springer Nature journal article supplement (doi:10.1186/s12998-015-0056-9), 2015-02-10

Researchers will interview  
Villagers about...

Your everyday troubles from  
MuBoJo conditions.

How MuBoJo troubles  
affect your life and work.

Helpful ways you care for  
MuBoJo conditions.

Services needed for people  
with MuBoJo conditions in  
Shoshong.

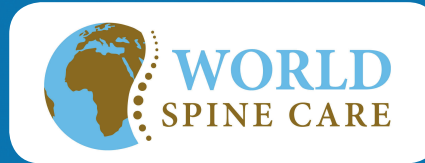

Questions about this project?  
Lead Researcher  
Dr. Maria Hondras  
+267 7698 7262

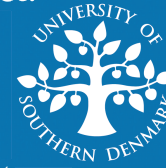

Questions about  
World Spine Care Clinic?  
+267 476 9033  
(behind the Shoshong Clinic)

Questions about your rights?  
MoH Representative  
Mr. Pilate Khulumani  
+267 391 4467

The Botswana Ministry of Health  
approved this project on  
14 August 2013

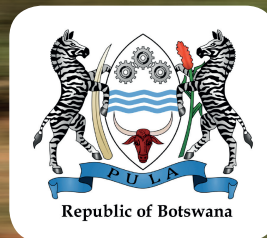

# MuBoJo Project

What is the best path  
to live with and care for  
**Muscles, Bones & Joints**  
in **Shoshong?**

This project will help us plan  
**Village healthcare**  
services

*We want to  
talk with you!*

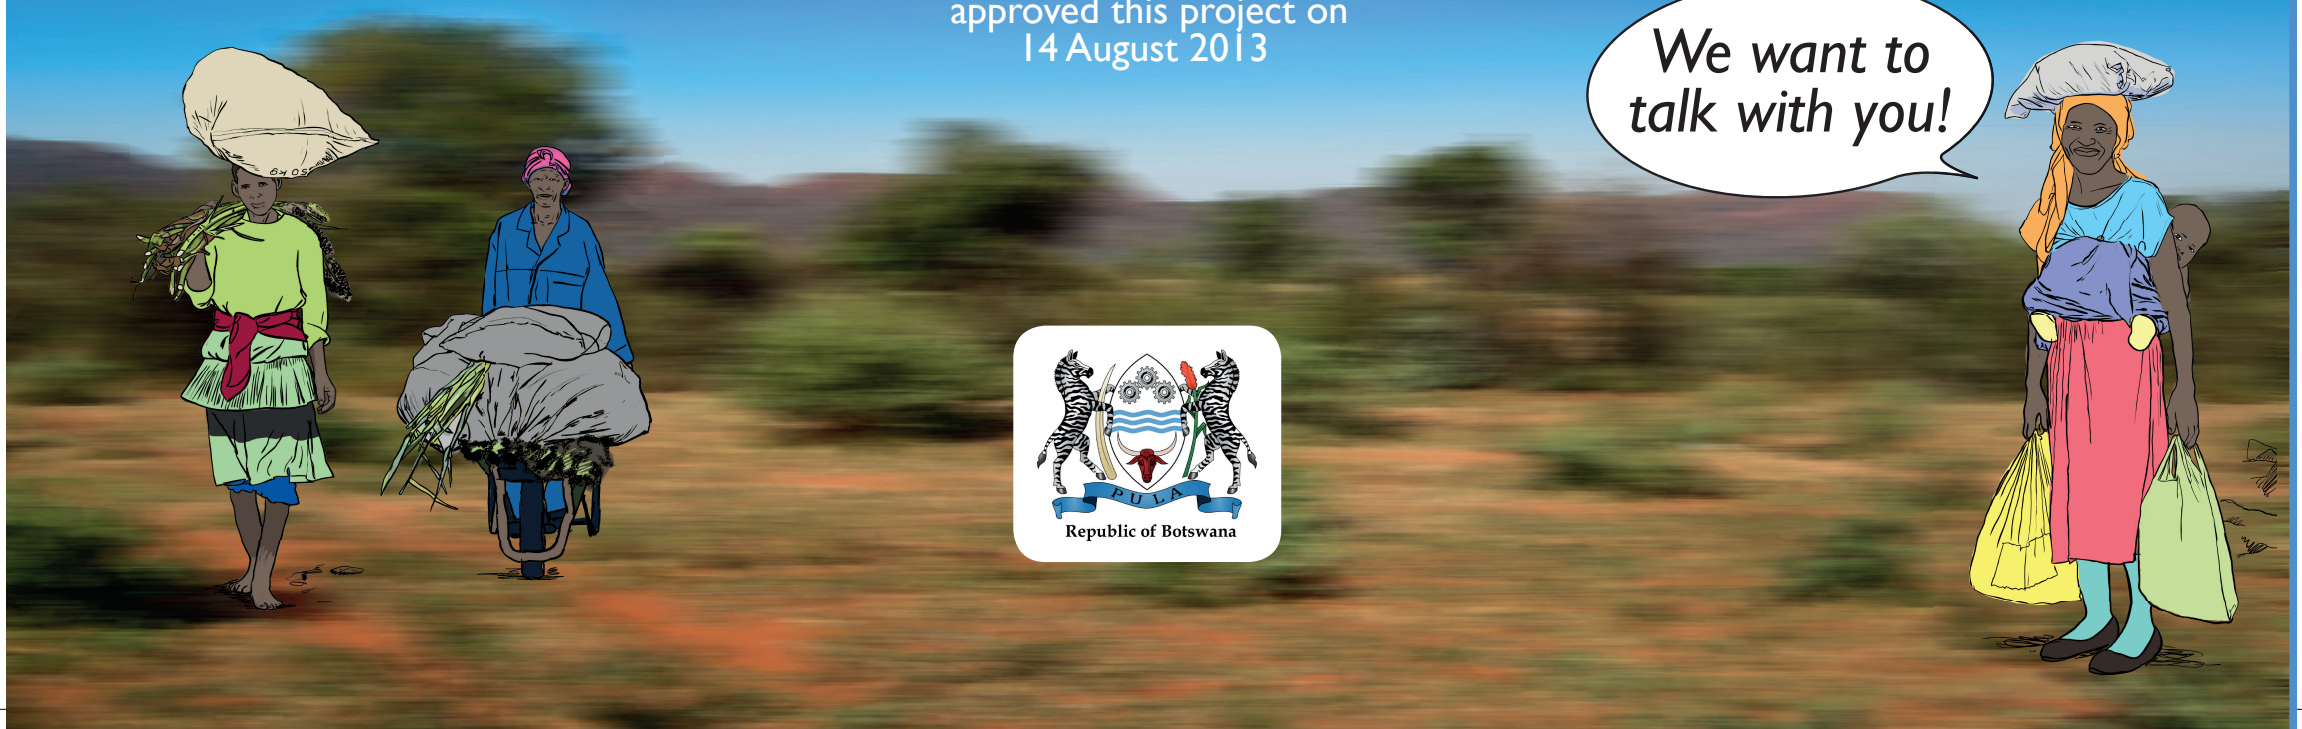

Do you have aches,  
pains, or troubles in  
your body?

Maybe you hurt a little.

Maybe you hurt a lot.

Maybe you know  
someone with  
**MuBoJo** problems?

Contact us! We want  
to talk with men and  
women of all ages.

# Mu

## Mesifa

The body has  
650 **Muscles**.

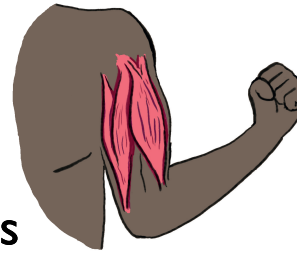

# Bo

## Marapo

The body has  
206 **Bones**.

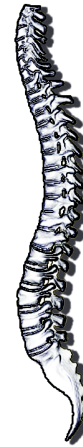

# Jo

## Ditokololo

The body has  
187 **Joints**.

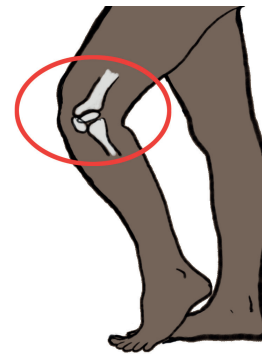

We want to learn from you!

Interviews may last one hour.

The information you share  
with us is private.

It is your choice  
to join this study.

You may stop at any time &  
do not need a reason.

Help us help  
Village Shoshong!

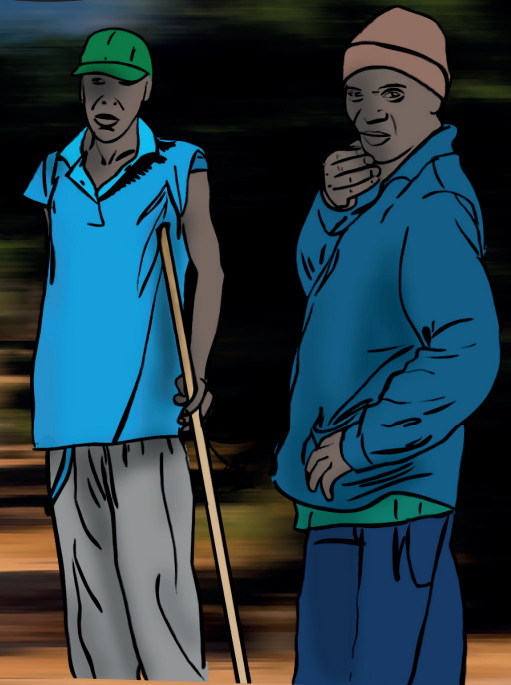

Supplement: MOESM3 [file 9771480]
