# Supplementary material for: How can we assess the burden of muscle, bone and joint conditions in rural Botswana: context and methods for the MuBoJo focused ethnography
Source: Springer Nature journal article supplement (doi:10.1186/s12998-015-0056-9), 2015-02-10
Supplement: MOESM6 [file 9771480]

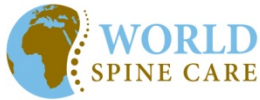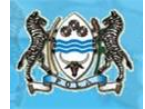

## **Dipatlisiso tsa MuBoJo Dipuisanyo Tsa Moagi wa Motse le Modiri wa Tsa Botsogo**

**Setlhogo sa Dipatlisiso:** Mathata a letsatsi le letsatsi a matlhoko a mesifa, marapo le ditokololo (**MuBoJo**) a a amang baagi ba Shoshong botshelo botlhe.

**Moeteledipele wa Dipatlisiso:** Maria Hondras DC, MPH  
World Spine Care Research Team  
PhD Student, University of Southern Denmark

**Tlhaloso ka Dipatlisiso:** Re buisanya le batho ka go ba botsa dipotso go tlhaloganya gore matlhoko a mesifa, marapo le ditokololo a ama matshelo a baagi ba Shoshong jang? Babatlisisi ba tla a dirisa maduo go thusa ka tlhokomelo ya batho ba matlhoko a mesifa, marapo le ditokololo.

**Seemo Sa Tetla:** Lephata la Botsogo la Botswana le letleletse dipatlisiso tse.  
**Letsatsi La Tetelelo:** 14 August 2013

### **Tumalano ya go Tsenelela Dipatlisiso**

Ke tlhaloganya gore ke tshwetso ya me go tsenelela dipatlisiso tse. Ke na le tshwanelo ya go emisa go araba dipotso nako e nngwe le e nngwe ga ke batla, gape ga ke tlamege go fa lebaka la gore ke eng ke emisa dipuisanyo.

Ke tlhaloganya gore ke kgona go lebelela tsamaiso ya dipatlisiso tse nako e nngwe le e nngwe ka go botsa boeteledipele jwa Phaleng, Bokaa le Kgamane Ward (Dikgosi), kgotsa mogolwane wa kokelwana ya Shoshong, kgotsa mookamedi wa dithuto tsa botsogo (Senior Health Education Assistant).

Ke nnile le sebaka sa go botsa dipotso mabapi le dipatlisiso.

### **Ke dumela go tsenelela dipatlisiso tse tsa MuBoJo.**

Letsatsi la \_\_\_\_\_ kgwedi ya \_\_\_\_\_ ngwaga wa 20\_\_\_\_\_

#### **Go Tsewa Lentswe**

- Ke fa tetla ya go tsewa lentswe la dipatlisiso tse.
- Ga ke letlelele go tsewa lentswe la dipatlisiso tse.

\_\_\_\_\_  
Leina la Motseneledi

\_\_\_\_\_  
Leina la Mosupi

\_\_\_\_\_  
Setlanyo sa Motseneledi

\_\_\_\_\_  
Setlanyo sa Mosupi
