# Supplementary material for: How can we assess the burden of muscle, bone and joint conditions in rural Botswana: context and methods for the MuBoJo focused ethnography
Source: Springer Nature journal article supplement (doi:10.1186/s12998-015-0056-9), 2015-02-10
Supplement: MOESM8 [file 9771480]

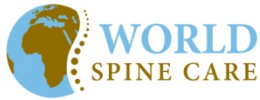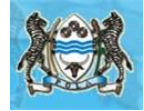

## Dipatlisiso Tsa MuBoJo

### Tumalano Ya Tiriso Ya Ditshwantsho Tse Di Emeng (Dinepe) Le Tsa Motshikinyego (Videos)

Ke fa World Spine Care tetla ya go dirisa dutshwantsho tsa me tse di tserweng tsa motshikinyego (videos) le tse di emeng (dinepe) gongwe le gongwe fa go lebaneng le mesifa, marapo le ditokololo kwa ntle ga tuelo (Dipatlisiso Tsa MuBoJo).

Ke tswelala ka go dumalana gore ga ke na go tseela World spine Care dikgato dipe mabapi le dingongorego dife fela tse di ka nnang teng kgathlanong le ditshwantsho tsa go nna jalo, fa di diriseditswe mesifa, marapo le ditokololo jaaka go tlhalositswe.

Letsatsi la \_\_\_\_\_ kgwedi ya \_\_\_\_\_, 20\_\_\_\_\_

\_\_\_\_\_  
Leina

\_\_\_\_\_  
Leina la Mosupi

\_\_\_\_\_  
Setlanyo

\_\_\_\_\_  
Setlanyo sa Mosupi

Ke tlhaloganya gore ga ke na le dipotso mabapi le Dipatlisiso Tsa MuBoJo, ke ka leletsa moeteledipele wa dipatlisiso tse, Dr. Maria Hondras mo mogaleng wa +267 7679 2761 ikgolaganya le ene, kgotsa go buisanya le badiri ka ene kwa World Spine Care go ka bua le ene. Fa ke na le dipotso mabapi le ditshwanelo tsa me jaaka mo tseneledi wa dipatlisiso tse, ke ka ikgolaganya le Mr. Pilate Khulumani, moemedi mo lephateng la Botsogo mo Botswana (Ministry Of Health) mogala ke +267 391 4467.

Ke lebogela gore o bo o re file tetla go dirisa ditshwantsho tsa gago tsa motshikinyego (videos) le tse di emeng (dinepe) mo dipatlisisong tse.

Ke go eleletsa masego le matlhogonolo,

A handwritten signature in blue ink, appearing to be "Maria Hondras".

Dr. Maria Hondras  
World Spine Care Research Team  
PhD Student, University of Southern Denmark  
Campusvej 55, DK-5230, Odense M, Denmark
